# Supplementary material for: Probing ice VII crystallization from amorphous NaCl–D2O solutions at gigapascal pressures
Source: Royal Society of Chemistry journal article supplement (doi:10.1039/c6cp07340a), 2016-12-08
Supplement: c6cp07340a1.pdf [file c6cp07340a1.pdf]

## Probing ice VII crystallization from amorphous NaCl-D<sub>2</sub>O solutions at gigapascal pressures

A.-A. Ludl, L. E. Bove, D. Corradini, A. M. Saitta, M. Salanne, C. L. Bull and S. Klotz

### Supplementary Material

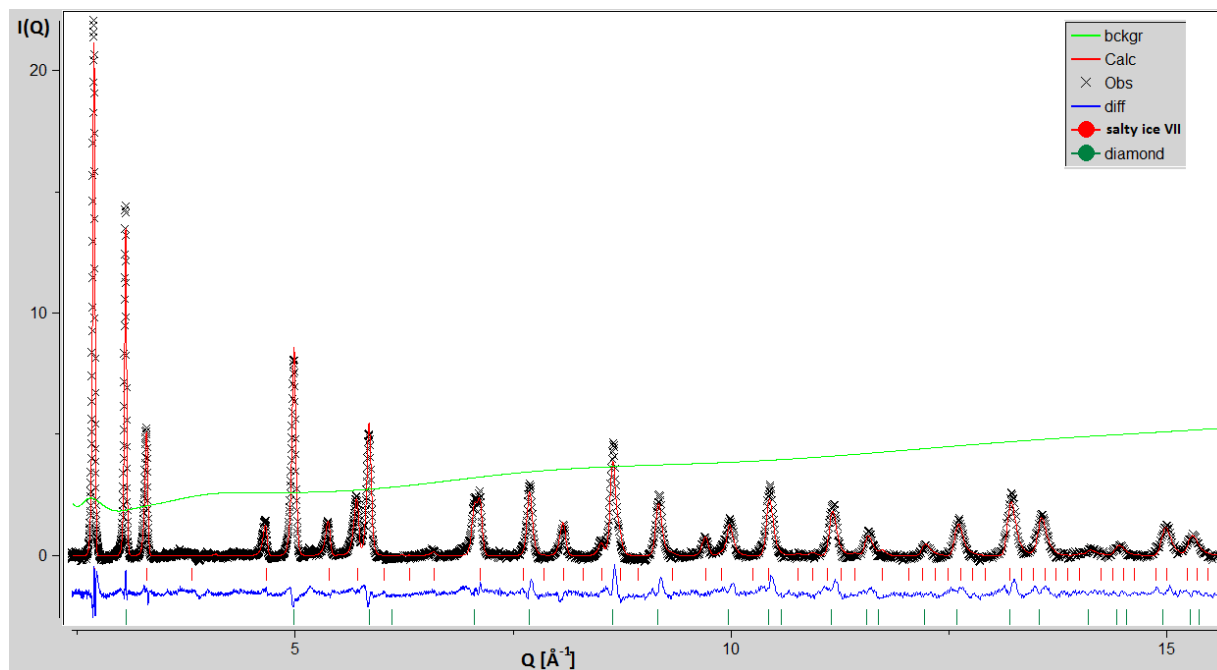

**Fig. S1** GSAS fit of sample A at 260 K and 3.6 GPa with a model of salty ice VII ( $R = 11.5$ ). The fit contains the following phases, the peak positions of which are indicated by tick marks. Salty ice VII red, diamond dark green,  $\beta$  N<sub>2</sub> in black.

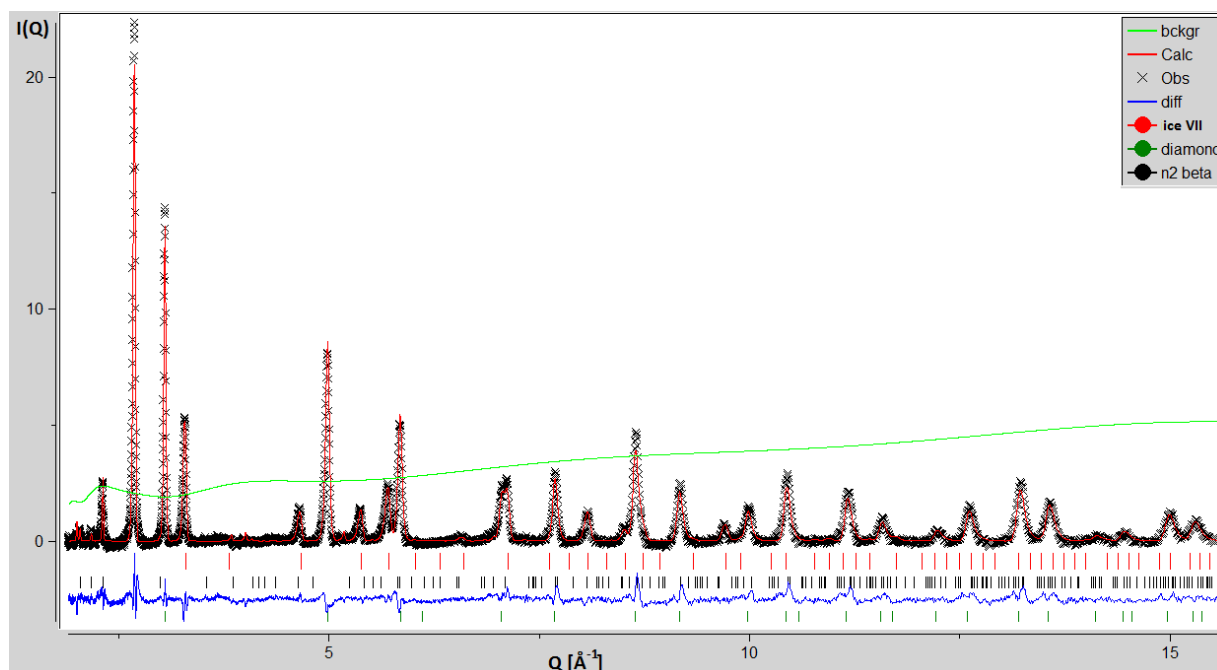

**Fig. S2** GSAS fit of sample A at 260 K and 3.6 GPa with a model of pure ice VII. The fit contains the following phases, the peak positions of which are indicated by tick marks. Salty ice VII red, diamond dark green.

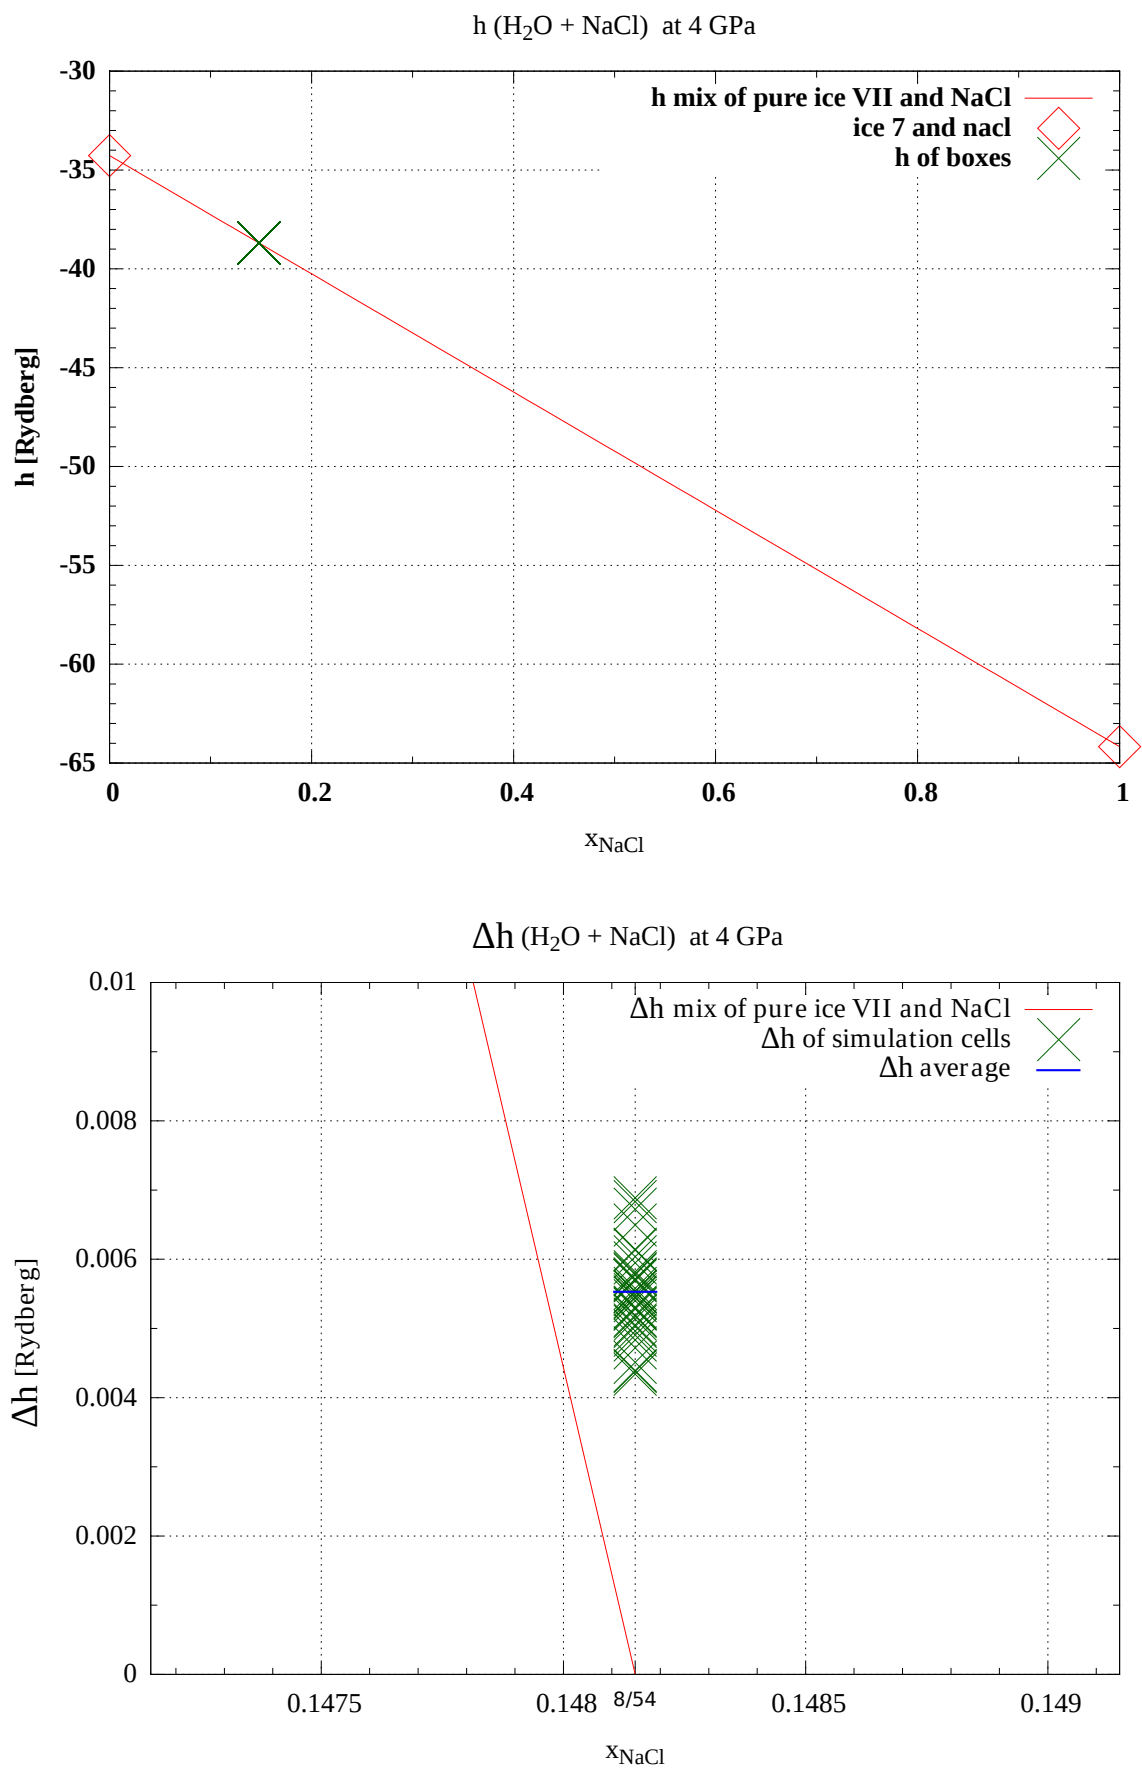

**Fig. S3** Convex hull diagram of the  $\Delta h$  enthalpy difference for configurations of salty ice with 8 ions ( $R = 11.5$ ) at 4 GPa. The abscissa indicated the molar fraction of salt  $x_{\text{NaCl}}$ . The red line gives the energy corresponding to phase separation at a given concentration. At both pressures the energy of the salty ice lies above that of phase separation.
